# Supplementary material
Source: PubMed Central journal article supplement (PMC6424352)
Supplement: NIHMS1515346-supplement-Supplemental_Material.pdf [file NIHMS1515346-supplement-Supplemental_Material.pdf]

Supplemental Material

Appendix eTable 1. Administrative Codes Used to Define Exposures, Major Covariates, and Outcomes

| Variable Name                                   | ICD-9-CM Code                                                                                                                                                                                                                                                                                        |
|-------------------------------------------------|------------------------------------------------------------------------------------------------------------------------------------------------------------------------------------------------------------------------------------------------------------------------------------------------------|
| ND-MCS                                          |                                                                                                                                                                                                                                                                                                      |
|                                                 | Percutaneous<br>Non-percutaneous                                                                                                                                                                                                                                                                     |
|                                                 | 37.68<br>37.60, 36.65                                                                                                                                                                                                                                                                                |
| IABP                                            | 37.61                                                                                                                                                                                                                                                                                                |
| ECMO                                            | 39.65                                                                                                                                                                                                                                                                                                |
| PCPS                                            | 39.66                                                                                                                                                                                                                                                                                                |
| Coronary angiography                            | 37.22, 37.23, 88.52, 88.53, 88.54, 88.55, 88.56, 88.57                                                                                                                                                                                                                                               |
| PCI                                             | 00.66, 17.55, 36.01, 36.02, 36.05, 36.06, 36.07                                                                                                                                                                                                                                                      |
| CABG                                            | 36.10-36.17, 36.19                                                                                                                                                                                                                                                                                   |
| Right heart catheterization                     | 37.21                                                                                                                                                                                                                                                                                                |
| Congestive heart failure                        | 398.91, 402.01, 402.11, 402.91, 404.01, 404.03, 404.11, 404.13, 404.91, 404.93, 428.0- 428.9                                                                                                                                                                                                         |
| Valvular disease                                | 093.20- 093.24, 394.0- 397.1, 397.9, 424.0- 424.99, 746.3- 746.6, V42.2, V43.3                                                                                                                                                                                                                       |
| Pulmonary circulation disorders                 | 415.11- 415.19, 416.0- 416.9, 417.9                                                                                                                                                                                                                                                                  |
| Peripheral vascular disorders                   | 440-440.9, 441.00- 441.9, 442.0- 442.9, 443.1- 443.9, 444.21- 444.22, 447.1, 449, 557.1, 557.9, V43.4                                                                                                                                                                                                |
| Paralysis                                       | 342.0- 344.9, 438.20- 438.53, 780.72                                                                                                                                                                                                                                                                 |
| Other neurological disorders                    | 330.1- 331.9, 332.0, 333.4, 333.5, 333.71, 333.72, 333.79, 333.85, 333.94, 334.0- 335.9, 338.0, 340, 341.1- 341.9, 345.00- 345.11, 345.2- 345.3, 345.40- 345.91, 347.00- 347.01, 347.10- 347.11, 649.40- 649.44, 768.7, 768.70, 768.71, 768.72, 780.3, 780.31, 780.32, 780.33, 780.39, 780.97, 784.3 |
| Chronic pulmonary disease                       | 490-492.8, 493.00- 493.92, 494-494.1, 495.0-505, 506.4                                                                                                                                                                                                                                               |
| Diabetes, uncomplicated                         | 249.00- 249.31, 250.00- 250.33, 648.00- 648.04                                                                                                                                                                                                                                                       |
| Diabetes with chronic complications             | 249.40- 249.91, 250.40- 250.93, 775.1                                                                                                                                                                                                                                                                |
| Hypothyroidism                                  | 243-244.2, 244.8, 244.9                                                                                                                                                                                                                                                                              |
| Renal failure                                   | 403.01, 403.11, 403.90, 403.91, 404.02, 404.03, 404.12, 404.13, 404.92, 404.93, 585.3, 585.4, 585.5, 585.6, 585.9, 586, V42.0, V45.1, V45.11, V45.12, V56.0- V56.32, V56.8                                                                                                                           |
| Liver disease                                   | 070.22, 070.23, 070.32, 070.33, 070.44, 070.54, 456.0, 456.1, 456.20, 456.21, 571.0, 571.2, 571.3, 571.40- 571.49, 571.5, 571.6, 571.8, 571.9, 572.3, 572.8, 573.5, V42.7                                                                                                                            |
| Peptic ulcer disease excluding bleeding         | 531.41, 531.51, 531.61, 531.70, 531.71, 531.91, 532.41, 532.51, 532.61, 532.70, 532.71, 532.91, 533.41, 533.51, 533.61, 533.70, 533.71, 533.91, 534.41, 534.51, 534.61, 534.70, 534.71, 534.91                                                                                                       |
| Acquired immune deficiency syndrome             | 042-044.9                                                                                                                                                                                                                                                                                            |
| Lymphoma                                        | 200.00- 202.38, 202.50- 203.01, 203.02- 203.82, 203.8- 203.81, 238.6, 273.3                                                                                                                                                                                                                          |
| Metastatic cancer                               | 196.0- 199.1, 209.70, 209.71, 209.72, 209.73, 209.74, 209.75, 209.79, 789.51                                                                                                                                                                                                                         |
| Solid tumor without metastasis                  | 140.0- 172.9, 174.0- 175.9, 179-195.8, 209.00- 209.24, 209.25- 209.3, 209.30- 209.36, 258.01- 258.03                                                                                                                                                                                                 |
| Rheumatoid arthritis/collagen vascular diseases | 701.0, 710.0- 710.9, 714.0- 714.9, 720.0- 720.9, 725                                                                                                                                                                                                                                                 |
| Coagulopathy                                    | 286.0- 286.9, 287.1, 287.3- 287.5, 289.84, 649.30- 649.34                                                                                                                                                                                                                                            |
| Obesity                                         | 278.0, 278.00, 278.01, 278.03, 649.10- 649.14, 793.91, V85.30- V85.39, V85.41- V85.45, V85.54                                                                                                                                                                                                        |
| Weight loss                                     | 260-263.9, 783.21, 783.22                                                                                                                                                                                                                                                                            |
| Fluid and electrolyte disorders                 | 276.0- 276.9                                                                                                                                                                                                                                                                                         |
| Chronic blood loss anemia                       | 280.0, 648.20- 648.24                                                                                                                                                                                                                                                                                |
| Deficiency anemias                              | 280.1- 281.9, 285.21- 285.29, 285.9                                                                                                                                                                                                                                                                  |
| Alcohol abuse                                   | 291.0- 291.3, 291.5, 291.8, 291.81, 291.82, 291.89, 291.9, 303.00- 303.93, 305.00- 305.03                                                                                                                                                                                                            |

|                                             |                                                                                            |
|---------------------------------------------|--------------------------------------------------------------------------------------------|
| Drug abuse                                  | 292.0, 292.82- 292.89, 292.9, 304.00- 304.93, 305.20- 305.93, 648.30- 648.34               |
| Psychoses                                   | 295.00- 298.9, 299.10, 299.11                                                              |
| Depression                                  | 300.4, 301.12, 309.0, 309.1, 311                                                           |
| Hypertension, complicated and uncomplicated | 401.1, 401.9, 642.00- 642.04, 401.0, 402.00- 405.99, 437.2, 642.10- 642.24, 642.70- 642.94 |

Appendix eTable 2. Characteristics of Hospitalizations for Myocardial Infarction Complicated by Cardiogenic Shock by Receipt of MCS

| Patient Variables                                           | Received MCS (N = 3469) | Did not receive MCS (N = 6969) | P-value* |
|-------------------------------------------------------------|-------------------------|--------------------------------|----------|
| Age, mean (SD)                                              | 66.1 (12.3)             | 70.1 (13.2)                    | < 0.001  |
| Female – no. (%)                                            | 1101 (31.7)             | 2859 (41.0)                    | < 0.001  |
| Admission from Emergency Department – no. (%)               | 2203 (63.5)             | 4660 (66.9)                    | < 0.001  |
| Elective admission – no. (%)                                | 207 (6.0)               | 447 (6.4)                      | 0.37     |
| Primary Insurance – no. (%)                                 |                         |                                | < 0.001  |
| Medicare                                                    | 1909 (55.1)             | 4689 (67.4)                    |          |
| Medicaid                                                    | 312 (9.0)               | 584 (8.4)                      |          |
| Private                                                     | 932 (26.9)              | 1210 (17.4)                    |          |
| Self-pay                                                    | 190 (5.5)               | 284 (4.1)                      |          |
| Other                                                       | 119 (3.5)               | 191 (2.7)                      |          |
| Heart Failure – no. (%)                                     | 293 (8.5)               | 1426 (20.5)                    | < 0.001  |
| Valvular disease – no. (%)                                  | 92 (2.6)                | 390 (5.6)                      | < 0.001  |
| Hypertension – no. (%)                                      | 2155 (62.1)             | 4393 (63.0)                    | 0.36     |
| Renal Failure – no. (%)                                     | 780 (22.5)              | 2267 (32.5)                    | < 0.001  |
| Peripheral vascular disorders – no. (%)                     | 514 (14.8)              | 1158 (16.6)                    | 0.02     |
| Diabetes mellitus – no. (%)                                 | 1373 (39.6)             | 2782 (39.9)                    | 0.74     |
| Hypothyroidism – no. (%)                                    | 327 (9.4)               | 789 (11.3)                     | 0.0032   |
| Chronic pulmonary disease – no. (%)                         | 690 (19.9)              | 1804 (25.9)                    | < 0.001  |
| Pulmonary circulatory disorders – no. (%)                   | 51 (1.5)                | 290 (4.2)                      | < 0.001  |
| Alcohol or Drug Abuse – no. (%)                             | 219 (6.3)               | 463 (6.6)                      | 0.52     |
| Psychoses – no. (%)                                         | 80 (2.3)                | 217 (3.1)                      | 0.02     |
| Liver disease – no. (%)                                     | 70 (2.0)                | 221 (3.2)                      | < 0.001  |
| Depression - no. (%)                                        | 201 (5.8)               | 492 (7.1)                      | 0.01     |
| Solid tumor without metastases – no. (%)                    | 41 (1.2)                | 172 (2.5)                      | < 0.001  |
| Lymphoma - no. (%)                                          | 18 (0.5)                | 54 (0.8)                       | 0.14     |
| Metastatic cancer – no. (%)                                 | 31 (0.9)                | 115 (1.7)                      | 0.0019   |
| Coagulopathy – no. (%)                                      | 819 (23.6)              | 1141 (16.4)                    | < 0.001  |
| Chronic blood loss anemia – no. (%)                         | 34 (1.0)                | 93 (1.3)                       | 0.12     |
| Deficiency anemias – no. (%)                                | 716 (20.6)              | 1719 (24.7)                    | < 0.001  |
| Paralysis – no. (%)                                         | 99 (2.9)                | 261 (3.8)                      | 0.02     |
| Other Neurologic Disorder – no. (%)                         | 229 (6.6)               | 705 (10.1)                     | < 0.001  |
| Peptic ulcer disease – no. (%)                              | 2 (0.1)                 | 1 (0.0)                        | 0.26     |
| Acquired Immune Deficiency Syndrome - no. (%)               | 6 (0.2)                 | 6 (0.1)                        | 0.23     |
| Rheumatoid arthritis / collagen vascular diseases – no. (%) | 85 (2.5)                | 165 (2.4)                      | 0.79     |
| Weight loss – no. (%)                                       | 322 (9.3)               | 760 (10.9)                     | 0.01     |
| Obesity – no. (%)                                           | 572 (16.5)              | 991 (14.2)                     | 0.0022   |
| Fluid and electrolyte disorders - no. (%)                   | 1930 (55.6)             | 4201 (60.3)                    | < 0.001  |

\*p-value for ANOVA/Chi-squared test across quartiles. †Represents the proportion in each quartile of MCS ratio in the analytical sample. Estimates for exclusions are for hospitalizations excluded due to hospitalization at a site performing <10 PCIs per year or resulting in transfer to an acute care hospital, and do not include information on missing hospitalizations (N = 3). N = the number of hospitalizations for cardiogenic shock and MI. MCS = mechanical circulatory support.

Appendix eTable 3: Rate of IABP vs. non-IABP MCS Utilization among Hospitalizations for Cardiogenic Shock and MI by Quartile of Hospital PCI Volume

|                            | <b>Quartile 1<br/>(N = 789)</b> | <b>Quartile 2<br/>(N = 781)</b> | <b>Quartile 3<br/>(N = 794)</b> | <b>Quartile 4<br/>(N = 770)</b> |
|----------------------------|---------------------------------|---------------------------------|---------------------------------|---------------------------------|
| IABP use – no. (%)         | 743 (26.5)                      | 710 (25.3)                      | 686 (24.4)                      | 669 (23.8)                      |
| Non-IABP MCS use – no. (%) | 46 (14.1)                       | 71 (21.8)                       | 108 (33.1)                      | 101 (31.0)                      |

Chi square p-value < 0.001. Quartiles 1-4 represents quartiles of hospital PCI volume. Non-IABP MCS includes percutaneous and non-percutaneous ND-MCS, ECMO, and PCPS. No. = number. IABP = Intra-aortic balloon pump. MCS = Mechanical Circulatory Support. PCI = Percutaneous Coronary Intervention. MI = Myocardial infarction. ND-MCS = non-durable mechanical circulatory support. ECMO = centrally cannulated extracorporeal membrane oxygenation. PCPS = peripherally cannulated extracorporeal membrane oxygenation.

Appendix eTable 4. Multivariable Adjusted Predictors of Receipt of Mechanical Circulatory Support Among Hospitalizations for Myocardial Infarction Complicated by Cardiogenic Shock

| Variables                                     | Odds Ratio (OR) | 95% CI    | P-value           |
|-----------------------------------------------|-----------------|-----------|-------------------|
| Age*                                          | 0.99            | 0.99-1.0  | 0.03              |
| Admitted from Emergency Department            | 0.90            | 0.80-1.01 | 0.08              |
| Elective Admission                            | 0.86            | 0.69-1.08 | 0.20              |
| Primary insurance                             |                 |           | 0.13              |
| Medicare                                      | -               | -         |                   |
| Medicaid                                      | 0.96            | 0.78-1.18 |                   |
| Private                                       | 1.14            | 0.98-1.31 |                   |
| Self-pay                                      | 1.12            | 0.87-1.44 |                   |
| Heart Failure                                 | 0.92            | 0.77-1.10 | 0.35              |
| Renal Failure                                 | 0.75            | 0.67-0.85 | <0.001            |
| Chronic pulmonary disease                     | 0.72            | 0.64-0.82 | <0.001            |
| Pulmonary circulatory disorders               | 0.88            | 0.59-1.31 | 0.53              |
| Psychoses                                     | 0.72            | 0.52-1.0  | 0.05              |
| Solid tumor without metastases                | 0.73            | 0.49-1.11 | 0.14              |
| Coagulopathy                                  | 1.69            | 1.48-1.93 | <0.001            |
| Neurologic disorders                          | 0.75            | 0.62-0.90 | 0.0027            |
| Weight loss                                   | 1.05            | 0.88-1.25 | 0.59              |
| Fluid and electrolyte disorders               | 1.11            | 1.00-1.24 | 0.05              |
| Receipt of Percutaneous Coronary Intervention | 2.91            | 2.56-3.31 | <0.001            |
| Receipt of coronary angiography               | 4.07            | 3.53-4.70 | <0.001            |
| Receipt of Coronary Artery Bypass Grafting    | 5.28            | 4.53-6.16 | <0.001            |
| Receipt of Right Heart Catheterization        | 1.72            | 1.36-2.19 | <0.001            |
| Hospital Bedsize                              |                 |           | 0.67              |
| Small                                         | 0.98            | 0.78-1.23 |                   |
| Medium                                        | 0.93            | 0.80-1.09 |                   |
| Large                                         | -               | -         |                   |
| Hospital Ownership                            |                 |           | 0.02 <sup>†</sup> |
| Government                                    | 0.72            | 0.55-0.93 | 0.0129            |
| Nonprofit                                     | 0.97            | 0.82-1.15 | 0.70              |
| Private                                       | -               | -         | -                 |
| Hospital Location/teaching                    |                 |           | 0.16              |
| Rural                                         | 0.76            | 0.55-1.05 |                   |
| Urban nonteaching                             | 0.89            | 0.76-1.05 |                   |
| Urban teaching                                | -               | -         |                   |
| Hospital Total Discharges                     | 1.00            | 1.00-1.00 | 0.43              |

\*Odds ratio for one year of age increase. Variables included in the model are those that were significant at a level of  $p < 0.05$  on univariate testing. <sup>†</sup>Represents the omnibus p-value for the Type III fixed effect of hospital ownership. CI = Confidence Interval. IQR = interquartile range. No. = number. SD = standard deviation

Appendix eTable 5. Multivariable Adjusted Predictors of In-Hospital Mortality Among Hospitalizations for Myocardial Infarction Complicated by Cardiogenic Shock

| Variables                                     | Odds Ratio (OR) | 95% CI    | P-value |
|-----------------------------------------------|-----------------|-----------|---------|
| MCS Quartile                                  |                 |           | 0.78    |
| Quartile 1                                    | -               | -         | -       |
| Quartile 2                                    | 0.99            | 0.82-1.19 | 0.87    |
| Quartile 3                                    | 1.05            | 0.86-1.28 | 0.63    |
| Quartile 4                                    | 0.95            | 0.77-1.16 | 0.58    |
| Age*                                          | 1.02            | 1.02-1.03 | < 0.001 |
| Female                                        | 1.17            | 1.02-1.35 | 0.03    |
| Admitted from Emergency Department            | 1.10            | 0.94-1.26 | 0.24    |
| Elective Admission                            | 0.91            | 0.67-1.24 | 0.56    |
| Primary insurance                             |                 |           | 0.01    |
| Medicare                                      | -               | -         | -       |
| Medicaid                                      | 0.82            | 0.63-1.09 | 0.17    |
| Private                                       | 0.87            | 0.72-1.06 | 0.01    |
| Self-pay                                      | 1.60            | 1.13-2.26 | 0.14    |
| Heart Failure                                 | 0.64            | 0.62-0.78 | < 0.001 |
| Valvular Heart Disease                        | 1.23            | 0.87-1.72 | 0.24    |
| Hypertension                                  | 1.02            | 0.89-1.18 | 0.74    |
| Renal Failure                                 | 0.91            | 0.78-1.07 | 0.26    |
| Peripheral Vascular Disease                   | 1.55            | 1.30-1.86 | < 0.001 |
| Diabetes Mellitus                             | 1.08            | 0.94-1.24 | 0.30    |
| Hypothyroidism                                | 0.80            | 0.64-1.00 | 0.05    |
| Chronic pulmonary disease                     | 0.90            | 0.77-1.05 | 0.18    |
| Pulmonary circulatory disorders               | 1.02            | 0.68-1.52 | 0.93    |
| Psychoses                                     | 0.65            | 0.42-1.01 | 0.05    |
| Liver disease                                 | 1.12            | 0.75-1.66 | 0.01    |
| Depression                                    | 0.69            | 0.52-0.91 | 0.01    |
| Solid tumor without metastases                | 0.73            | 0.45-1.19 | 0.21    |
| Lymphoma                                      | 1.15            | 0.51-2.58 | 0.74    |
| Metastatic cancer                             | 2.27            | 1.27-4.06 | 0.01    |
| Coagulopathy                                  | 1.16            | 0.98-1.37 | 0.09    |
| Blood loss                                    | 0.68            | 0.37-1.28 | 0.23    |
| Deficiency Anemias                            | 0.72            | 0.61-0.85 | < 0.001 |
| Paralysis                                     | 1.19            | 0.84-1.68 | 0.33    |
| Neurologic disorders                          | 1.54            | 1.22-1.95 | < 0.001 |
| Acquired Immune Deficiency Syndrome           | 0.50            | 0.05-5.10 | 0.56    |
| Weight loss                                   | 0.59            | 0.56-0.86 | < 0.001 |
| Obesity                                       | 0.93            | 0.76-1.13 | 0.44    |
| Fluid and electrolyte disorders               | 1.53            | 1.32-1.77 | < 0.001 |
| Receipt of Percutaneous Coronary Intervention | 0.67            | 0.54-0.82 | < 0.001 |
| Receipt of coronary angiography               | 0.64            | 0.53-0.76 | < 0.001 |
| Receipt of Coronary Artery Bypass Grafting    | 0.19            | 0.15-0.25 | < 0.001 |
| Receipt of Right Heart Catheterization        | 1.01            | 0.75-1.36 | 0.97    |
| Hospital Bedsize                              |                 |           | 0.58    |
| Small                                         | 1.22            | 0.82-1.83 | 0.32    |
| Medium                                        | 1.06            | 0.86-1.29 | 0.61    |
| Large                                         | -               | -         | -       |
| Hospital Ownership                            |                 |           | 0.21    |
| Government                                    | 0.76            | 0.55-1.04 | 0.09    |
| Nonprofit                                     | 0.83            | 0.65-1.06 | 0.13    |
| Private                                       | -               | -         | -       |

|                            |                         |      |            |         |
|----------------------------|-------------------------|------|------------|---------|
| Hospital Location/teaching |                         |      |            | 0.37    |
|                            | Rural                   | 1.39 | 0.87-2.23  | 0.17    |
|                            | Urban nonteaching       | 1.06 | 0.84-1.33  | 0.63    |
|                            | Urban teaching          | -    | -          | -       |
| Hospital Region            |                         |      |            | 0.27    |
|                            | Northeast               | 0.80 | 0.53-1.02  | 0.07    |
|                            | Midwest                 | 0.84 | 0.67-1.05  | 0.13    |
|                            | South                   | 0.83 | 0.67-1.03  | 0.08    |
|                            | West                    | -    | -          | -       |
| MCS Subtype                |                         |      |            |         |
|                            | Percutaneous ND-MCS     | 3.27 | 2.39-4.48  | < 0.001 |
|                            | Non-percutaneous ND-MCS | 7.34 | 0.64-84.17 | 0.11    |
|                            | IABP                    | 1.95 | 1.63-2.34  | < 0.001 |
|                            | ECMO                    | 5.42 | 3.49-8.42  | < 0.001 |
|                            | PCPS                    | 2.87 | 0.16-50.96 | 0.47    |

\*Odds ratio for one year of age increase. 95% CI = 95% Confidence Interval. MCS = Mechanical Circulatory Support. ND-MCS = non-durable mechanical circulatory support. IABP = Intra-aortic balloon pump. ECMO = Extracorporeal Membrane Oxygenation. PCPS = percutaneous cardiopulmonary support.



eTable 6. Results of Sensitivity Analysis: Characteristics of Hospitals Utilizing Mechanical Circulatory Support, Limited to Hospitals with Ten or More Hospitalizations for Cardiogenic Shock and Myocardial Infarction

| Hospital Variables              | Quartile 1<br>(N = 76) | Quartile 2<br>(N = 70) | Quartile 3<br>(N = 68) | Quartile 4<br>(N = 71) | P-value*          |
|---------------------------------|------------------------|------------------------|------------------------|------------------------|-------------------|
| Bedsizes – no. (%)              |                        |                        |                        |                        | 0.30              |
| Small                           | 2 (2.6)                | 3 (4.3)                | 2 (2.9)                | 6 (8.5)                |                   |
| Medium                          | 18 (23.7)              | 15 (21.4)              | 8 (11.8)               | 15 (21.1)              |                   |
| Large                           | 56 (73.7)              | 52 (74.3)              | 58(85.3)               | 50 (70.4)              |                   |
| Hospital Ownership – no. (%)    |                        |                        |                        |                        | 0.07              |
| Government                      | 14 (18.4)              | 4 (5.7)                | 5 (7.4)                | 5 (7.0)                |                   |
| Non-profit                      | 58 (76.3)              | 58(82.9)               | 55 (88.8)              | 55(77.5)               |                   |
| Private                         | 4 (5.3)                | 8 (11.4)               | 8(11.8)                | 11 (15.5)              |                   |
| Location/teaching – no. (%)     |                        |                        |                        |                        | 0.24              |
| Rural                           | 1 (1.3)                | 0 (0)                  | 4 (5.9)                | 1 (1.4)                |                   |
| Urban nonteaching               | 12 (15.8)              | 13 (18.6)              | 8 (11.8)               | 7 (9.9)                |                   |
| Urban teaching                  | 63 (82.9)              | 57 (81.4)              | 56 (82.3)              | 63 (88.7)              |                   |
| Hospital region – no. (%)       |                        |                        |                        |                        | 0.06              |
| Northeast                       | 12 (15.8)              | 12 (17.1)              | 13 (19.1)              | 17(23.9)               |                   |
| Midwest / North Central         | 17 (22.4)              | 12 (17.1)              | 9 (13.2)               | 25 (35.2)              |                   |
| South                           | 34 (44.7)              | 31(44.3)               | 30 (44.1)              | 18 (25.4)              |                   |
| West                            | 13 (17.1)              | 15 (21.5)              | 16 (13.6)              | 11(15.5)               |                   |
| Total Discharges – median (IQR) | 5376 (3959-7754)       | 5258 (3812-6493)       | 6411 (4779-7979)       | 4943 (3984-7926)       | 0.05 <sup>†</sup> |

\*p-value for Chi-squared test across quartiles except where otherwise specified. <sup>†</sup>p-value for Kruskal-Wallis test across quartiles. MCS = Mechanical Circulatory Support. IQR = interquartile range. N = the number of hospitals per quartile.

Appendix eTable 7. Results of Sensitivity Analysis: Crude and Unadjusted In-Hospital Mortality by Quartile of MCS Use in Hospitals with Ten or More Hospitalizations for Cardiogenic Shock and Myocardial Infarction

| <b>Quartile</b>       | <b>Observed In-hospital mortality – no. (%)</b>             | <b>Crude Odds Ratio for In-Hospital Mortality</b>                | <b>95% CI</b> | <b>P-value</b> |
|-----------------------|-------------------------------------------------------------|------------------------------------------------------------------|---------------|----------------|
| Quartile 1 (N = 1204) | 458 (38.0)                                                  | -                                                                | -             | -              |
| Quartile 2 (N = 1144) | 438 (38.3)                                                  | 1.01                                                             | 0.86-1.19     | 0.94           |
| Quartile 3 (N = 1106) | 442 (40.0)                                                  | 1.08                                                             | 0.92-1.28     | 0.21           |
| Quartile 4 (N = 1085) | 404 (37.2)                                                  | 0.97                                                             | 0.82-1.15     | 0.21           |
| <b>Quartile</b>       | <b>Adjusted In-hospital mortality – no. (%)<sup>*</sup></b> | <b>Adjusted Odds Ratio for In-Hospital Mortality<sup>*</sup></b> | <b>95% CI</b> | <b>P-value</b> |
| Quartile 1 (N = 1204) | 458 (38.0)                                                  | -                                                                | -             | -              |
| Quartile 2 (N = 1144) | 437 (38.2)                                                  | 0.99                                                             | 0.82-1.19     | 0.87           |
| Quartile 3 (N = 1106) | 442 (40.0)                                                  | 1.05                                                             | 0.96-1.28     | 0.63           |
| Quartile 4 (N = 1085) | 404 (37.1)                                                  | 0.95                                                             | 0.77-1.16     | 0.58           |

MCS = Mechanical Circulatory Support. 95% CI = 95% Confidence Interval. <sup>\*</sup>Adjusted for age, sex, all patient and hospital variables, receipt of coronary angiography, PCI, CABG, RHC, and device subtype. Omnibus adjusted p-value for effect of quartile on in-hospital mortality = 0.78. Abbreviations: CI = confidence interval. N = the number of hospitalizations for cardiogenic shock and MI.

eTable 8. Results of Sensitivity Analysis in the Nationwide Readmissions Database: Quartiles of MCS ratio

| Procedure                                                                         | Quartile 1<br>(N = 2698) | Quartile 2<br>(N = 5744) | Quartile 3<br>(N = 6574) | Quartile 4<br>(N = 5501) | P-value* |
|-----------------------------------------------------------------------------------|--------------------------|--------------------------|--------------------------|--------------------------|----------|
| MCS ratio (%) – median (IQR)                                                      | 5.0% (0.0-12.9%)         | 25.0% (20.6-27.6%)       | 36.3% (33.3-39.3%)       | 50.0% (46.8-60.0%)       | < 0.001  |
| ND-MCS (percutaneous) – no. (%)                                                   | 39 (1.5)                 | 168 (2.9)                | 353 (5.4)                | 471 (8.6)                | < 0.001  |
| ND-MCS (non-percutaneous) – no. (%)                                               | 0 (0.0)                  | 0 (0.0)                  | 0 (0.0)                  | 7 (0.1)                  | < 0.001  |
| IABP – no. (%)                                                                    | 231 (8.6)                | 1264 (22.0)              | 2085 (31.7)              | 2452 (44.6)              | < 0.001  |
| ECMO – no. (%)                                                                    | 4 (0.2)                  | 48 (0.8)                 | 146 (2.2)                | 188 (3.4)                | < 0.001  |
| PCPS – no. (%)                                                                    | 0 (0.0)                  | 0 (0.0)                  | 3 (0.1)                  | 6 (0.1)                  | 0.03     |
| Adjusted Odds Ratio (95% CI) for In-Hospital Mortality                            | -                        | 1.03 (0.92-1.14)         | 0.95 (0.86-1.06)         | 0.98 (0.88-1.10)         | 0.33     |
| Adjusted Odds Ratio (95% CI) for In-Hospital Mortality for MCS ratio <sup>†</sup> | 0.88 (0.70-1.09)         |                          |                          |                          | 0.23     |

\* p-value for Chi-squared test across quartiles. IQR = interquartile range. N = number of hospitals per quartile. MCS Ratio = Proportion of MCS use per hospitalization for MI with CS. <sup>†</sup>Represents adjusted odds ratio for the effect of MCS ratio on in-hospital mortality with MCS ratio treated as a continuous measure; p-value from Wald test.

Appendix eFigure 1. Histogram demonstrating the proportion of hospitalizations for myocardial infarction and cardiogenic shock utilizing MCS by hospital, in Hospitals with Ten or More Hospitalizations for Cardiogenic Shock and Myocardial Infarction

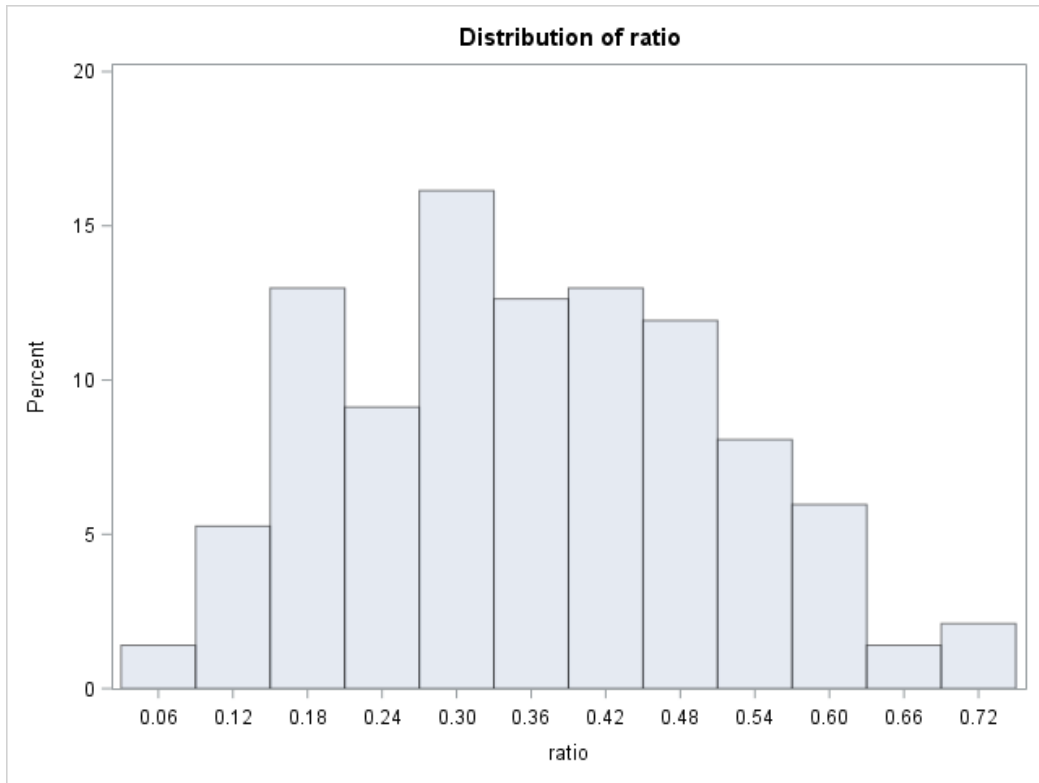

Ratio = Proportion of mechanical circulatory support use per hospitalization for myocardial infarction and cardiogenic shock.  
Median (IQR) ratio = 36.4% (25.0-46.7%).

Appendix eFigure 2. Histogram demonstrating the proportion of hospitalizations for myocardial infarction with cardiogenic shock utilizing MCS by hospital in the Nationwide Readmissions Database

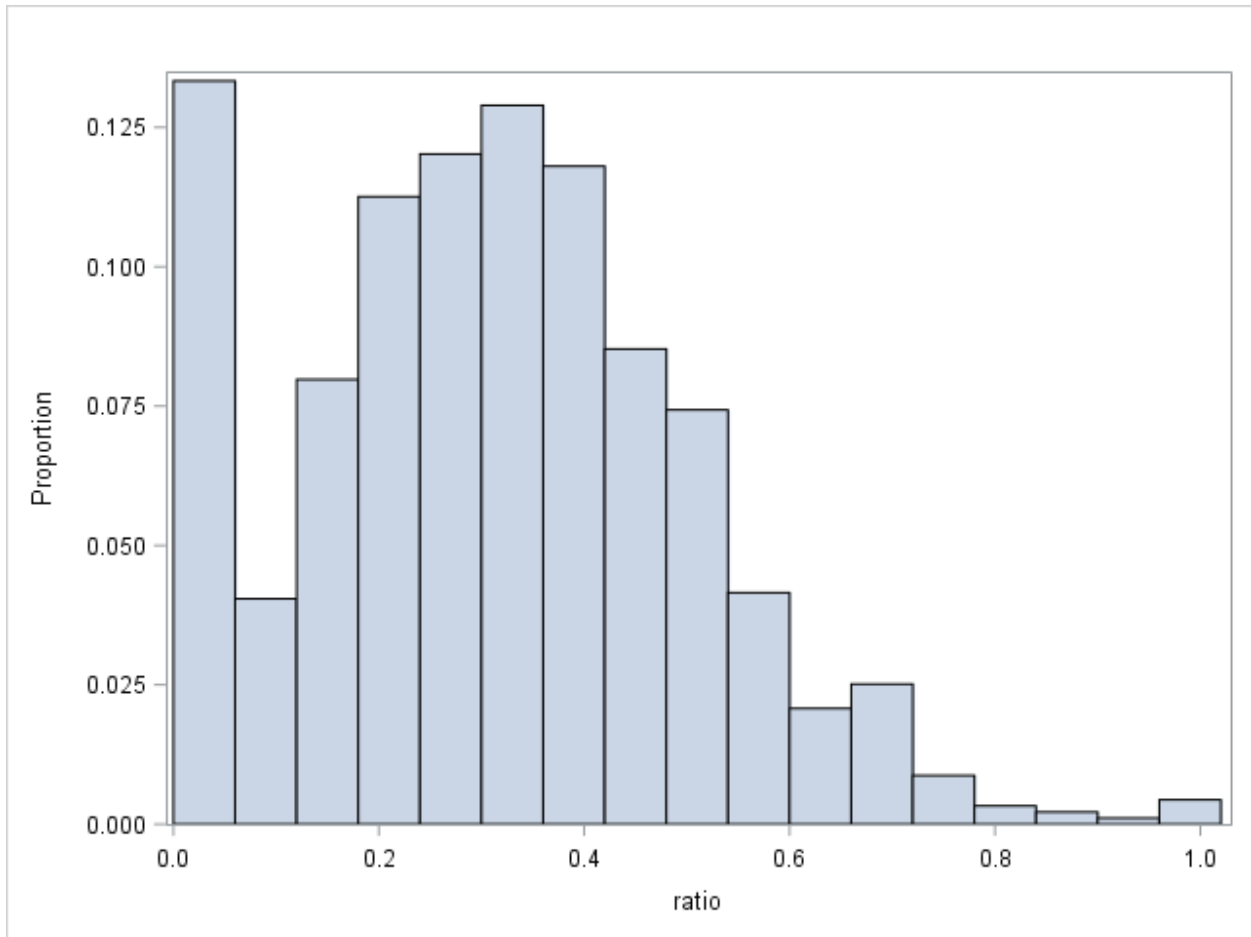

Ratio = Proportion of mechanical circulatory support use per hospitalization for myocardial infarction and cardiogenic shock.  
Median (IQR) ratio = of 30.0% (17.6-62.5%)
